# Supplementary material for: A metal-binding site in the RTN1-C protein: new perspectives on the physiological role of a neuronal protein
Source: Royal Society of Chemistry journal article supplement (doi:10.1039/c2mt20035j), 2012-01-01
Supplement: c2mt20035j.pdf [file c2mt20035j.pdf]

## SUPPLEMENTARY MATERIAL

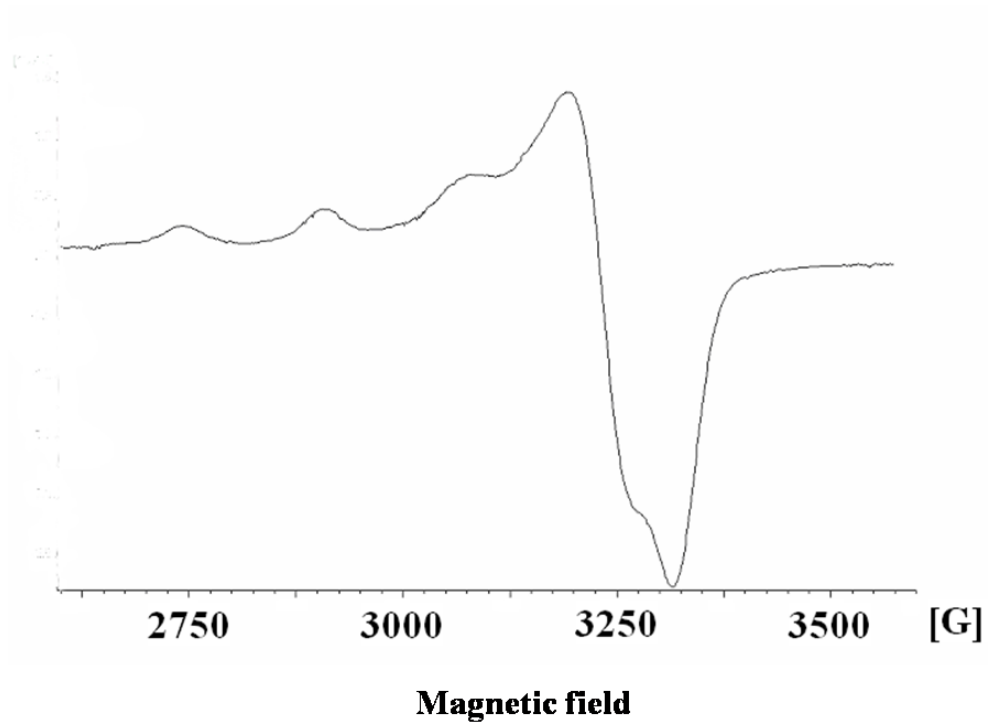

**Figure 1S.** Low-temperature EPR spectrum of Cu-RTN1C10<sub>CT</sub> complex, 1:1 Cu/peptide molar ratio, in 50 mM HEPES, pH 7.11, buffer.

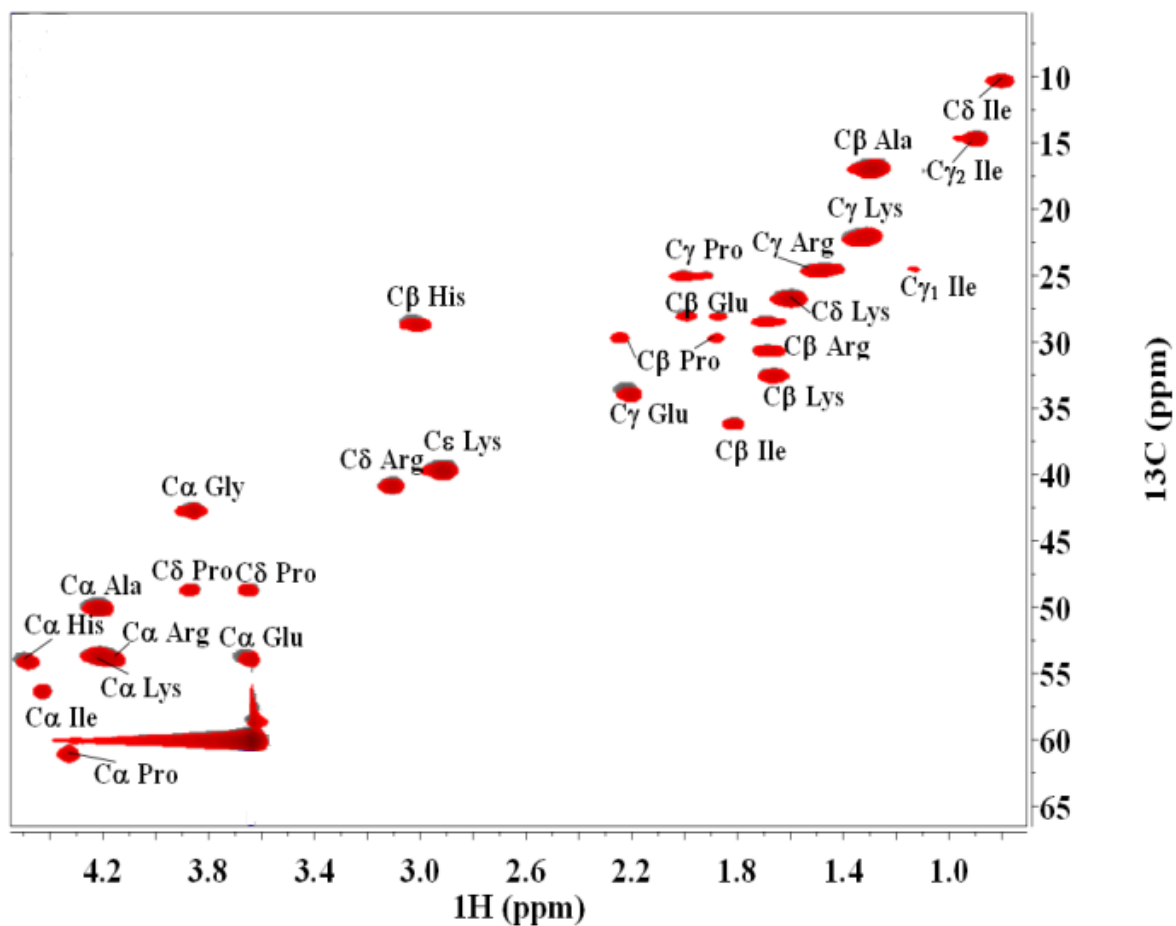

**Figure 2S.** Overlay of the aliphatic region of 2D <sup>1</sup>H-<sup>13</sup>C HSQC spectra of RTN1-C10<sub>CT</sub> (black) and Zn<sup>2+</sup>-RTN1-C10<sub>CT</sub> (red) complex (1:1 c/c) at pH 7.3.

**Table 1S.** Chemical shifts of  $^1\text{H}$  resonances of RTN1-C10<sub>CT</sub> peptide.

| RTN1-C10 <sub>CT</sub> |                |                      |         |                |                      |
|------------------------|----------------|----------------------|---------|----------------|----------------------|
| Residue                | Hydrogen       | $\Delta\delta$ (ppm) | Residue | Hydrogen       | $\Delta\delta$ (ppm) |
| K                      | H $\alpha$     | 4.21                 | K       | H $\delta$ 1   | 1.58                 |
| K                      | H $\beta$ 1    | 1.66                 | K       | H $\delta$ 2   | 1.58                 |
| K                      | H $\beta$ 2    | 1.66                 | K       | H $\epsilon$ 1 | 2.89                 |
| K                      | H $\gamma$ 1   | 1.32                 | K       | H $\epsilon$ 2 | 2.89                 |
| K                      | H $\gamma$ 2   | 1.,32                | K       | H $\zeta$      | nd                   |
| K                      | H $\delta$ 1   | 1.58                 | R       | H $\alpha$     | 4.19                 |
| K                      | H $\delta$ 2   | 1.58                 | R       | H $\beta$ 1    | 1.65                 |
| K                      | H $\epsilon$ 1 | 2:89                 | R       | H $\beta$ 2    | 1.65                 |
| K                      | H $\epsilon$ 2 | 2.89                 | R       | H $\gamma$ 1   | 1.46                 |
| K                      | H $\zeta$      | nd                   | R       | H $\gamma$ 2   | 1.46                 |
| I                      | H $\alpha$     | 4.42                 | R       | H $\delta$ 1   | 3.10                 |
| I                      | H $\beta$      | 1.79                 | R       | H $\delta$ 2   | 3.10                 |
| I                      | H $\gamma$ 1-1 | 1.10                 | R       | H $\epsilon$   | nd                   |
| I                      | H $\gamma$ 1-2 | 1.41                 | R       | HH1-1          | nd                   |
| I                      | H $\gamma$ 2   | 0.89                 | R       | HH1-2          | nd                   |
| I                      | H $\delta$ 1   | 0.78                 | R       | HH2-1          | nd                   |
| P                      | H $\alpha$     | 4.32                 | R       | HH2-2          | nd                   |
| P                      | H $\beta$ 1    | 1.87                 | H       | H $\alpha$     | 4.48                 |
| P                      | H $\beta$ 2    | 2.24                 | H       | H $\beta$ 1    | 299                  |
| P                      | H $\gamma$ 1   | 1.91                 | H       | H $\beta$ 2    | 2.99                 |
| P                      | H $\gamma$ 2   | 2.,00                | H       | H $\delta$ 1   | nd                   |
| P                      | H $\delta$ 1   | 3.86                 | H       | H $\delta$ 2   | 6.91                 |
| P                      | H $\delta$ 2   | 3.65                 | H       | H $\epsilon$ 1 | 7.68                 |
| G                      | H $\alpha$ 1   | 3.86                 | H       | H $\epsilon$ 2 | nd                   |
| G                      | H $\alpha$ 2   | 3.86                 | A       | H $\alpha$     | 4.20                 |
| A                      | H $\alpha$     | 4.20                 | A       | H $\beta$      | 1.28                 |
| A                      | H $\beta$      | 1.28                 | E       | H $\alpha$     | 3.65                 |
| K                      | H $\alpha$     | 4.21                 | E       | H $\beta$ 1    | 1.87                 |
| K                      | H $\beta$ 1    | 1.66                 | E       | H $\beta$ 2    | 1.99                 |
| K                      | H $\beta$ 2    | 1.66                 | E       | H $\gamma$ 1   | 2.19                 |
| K                      | H $\gamma$ 1   | 1.32                 | E       | H $\gamma$ 2   | 2.19                 |
| K                      | H $\gamma$ 2   | 1.32                 |         |                |                      |

**Table 2S .** Chemical shifts of  $^{13}\text{C}$  resonances of RTN1-C10<sub>CT</sub>.

| Residue | RTN1-C10 <sub>CT</sub> |                      |
|---------|------------------------|----------------------|
|         | Carbon                 | $\Delta\delta$ (ppm) |
| K       | C $\alpha$             | 53.65                |
| K       | C $\beta$              | 32.61                |
| K       | C $\gamma$             | 22.33                |
| K       | C $\delta$             | 26.93                |
| K       | C $\epsilon$           | 39.73                |
| I       | C $\alpha$             | 56.35                |
| I       | C $\beta$              | 36.25                |
| I       | C $\gamma$ 1           | 24.64                |
| I       | C $\gamma$ 2           | 14.80                |
| I       | C $\delta$             | 10.46                |
| P       | C $\alpha$             | 61.13                |
| P       | C $\beta$              | 48.77                |
| P       | C $\gamma$             | 25.09                |
| G       | C $\alpha$             | 42.75                |
| A       | C $\alpha$             | 50.14                |
| A       | C $\beta$              | 16.97                |
| K       | C $\alpha$             | 53.65                |
| K       | C $\beta$              | 32.61                |
| K       | C $\gamma$             | 22.33                |
| K       | C $\delta$             | 26.93                |
| K       | C $\epsilon$           | 39.73                |
| R       | C $\alpha$             | 54.01                |
| R       | C $\beta$              | 30.73                |
| R       | C $\gamma$             | 24.61                |
| R       | C $\delta$             | 40.93                |
| H       | C $\alpha$             | 54.17                |
| H       | C $\beta$              | 28.77                |
| H       | C $\delta$ 2           | 136.12               |
| H       | C $\epsilon$ 1         | 117.53               |
| A       | C $\alpha$             | 50.14                |
| A       | C $\beta$              | 16.97                |
| E       | C $\alpha$             | 53.93                |
| E       | C $\beta$              | 28.13                |
| E       | C $\gamma$             | 34.02                |

**Table 3S.**  $^{13}\text{C}$  chemical shifts resonances of RTN1-C10<sub>CT</sub> alone and in the presence of  $\text{Zn}^{2+}$  (1:1 molar ratio)

---

| Residue | RTN1-C10 <sub>CT</sub> |                    | RTN1-C10 <sub>CT</sub> : $\text{Zn}^{2+}$<br>(1:1c/c) |        |                |
|---------|------------------------|--------------------|-------------------------------------------------------|--------|----------------|
|         | C                      | ppm ( $\delta_f$ ) | C                                                     | ppm    | $\Delta\delta$ |
| H       | C $\alpha$             | 54.17              | C $\alpha$                                            | 53.95  | -0.22          |
| H       | C $\beta$              | 28.77              | C $\beta$                                             | 28.45  | -0.32          |
| H       | C $\delta$             | 117.53             | C $\delta$                                            | 118.02 | 0.49           |
| E       | C $\alpha$             | 53.93              | C $\alpha$                                            | 53.76  | -0.17          |
| E       | C $\beta$              | 28.13              | C $\beta$                                             | 27.93  | -0.20          |
| E       | C $\gamma$             | 34.02              | C $\gamma$                                            | 33.71  | -0.31          |
